# Supplementary figures and images for: Tumor evolutionary directed graphs and the history of chronic lymphocytic leukemia
Source: eLife journal article supplement (doi:10.7554/elife.02869), 2014-12-11

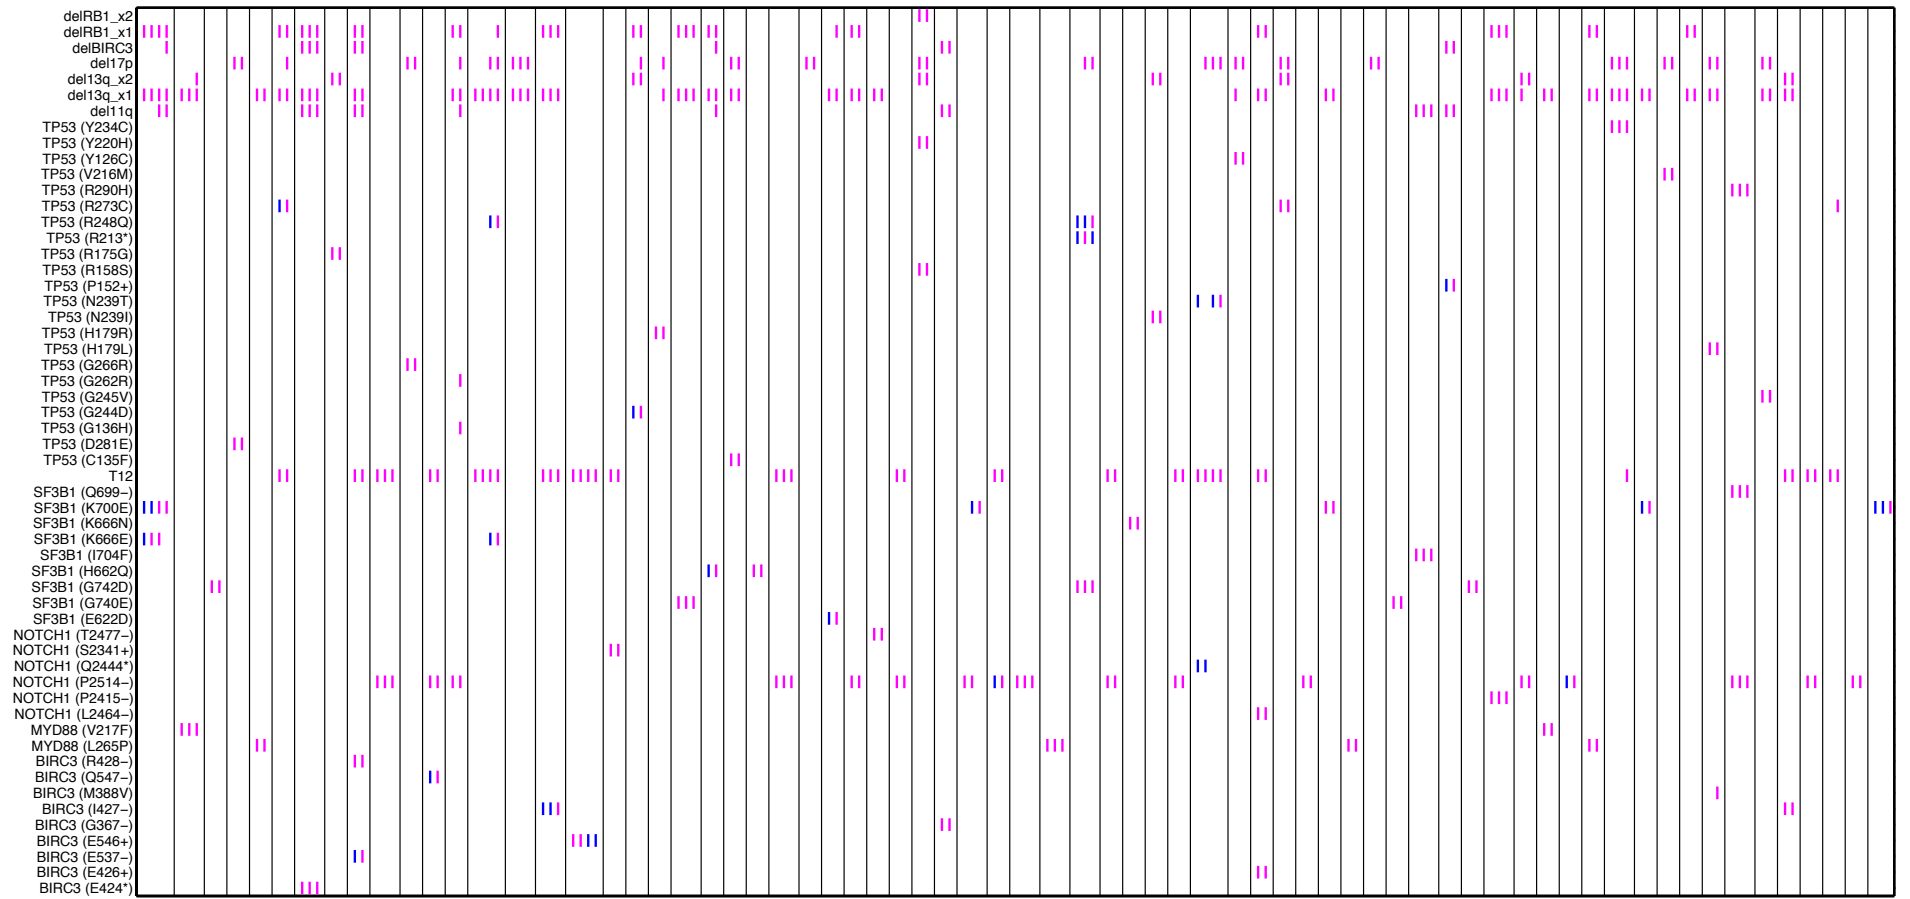

Supplement: supp [file elife-02869-supp-v1.zip]

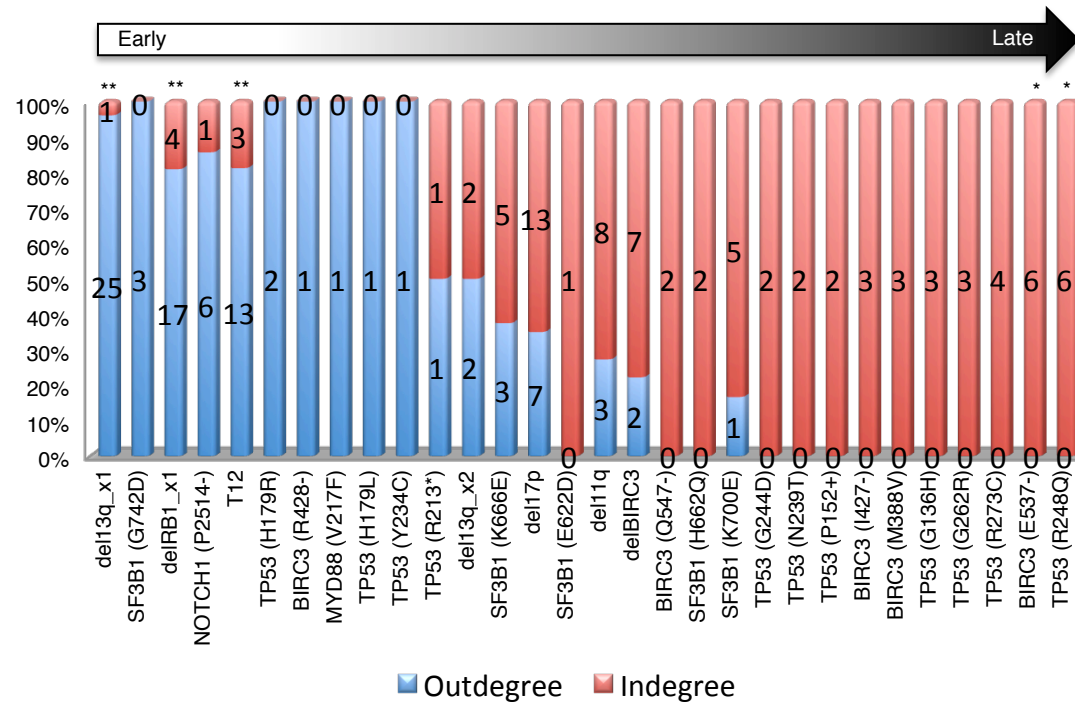

Supplement: supp [file elife-02869-supp-v1.zip]

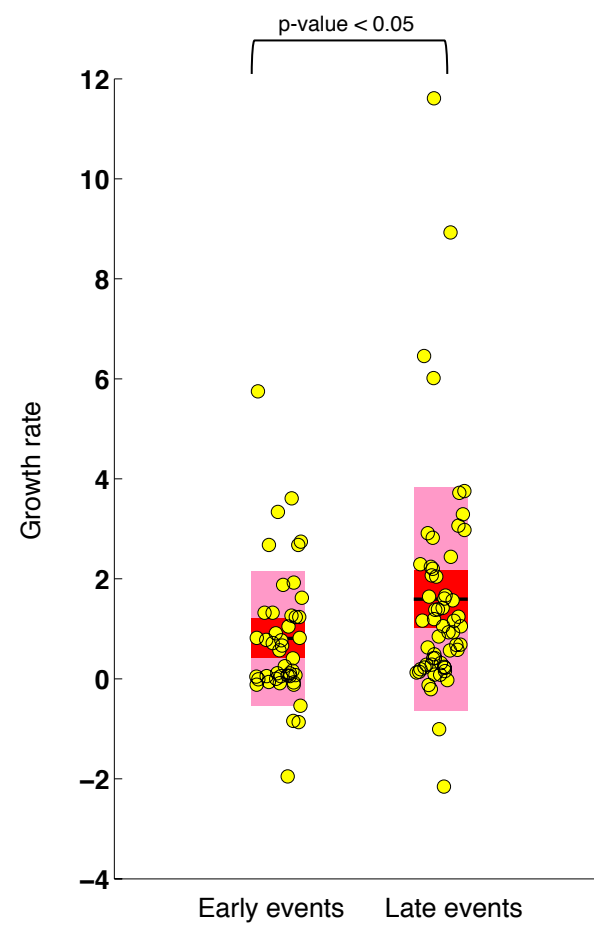

Supplement: supp [file elife-02869-supp-v1.zip]

A

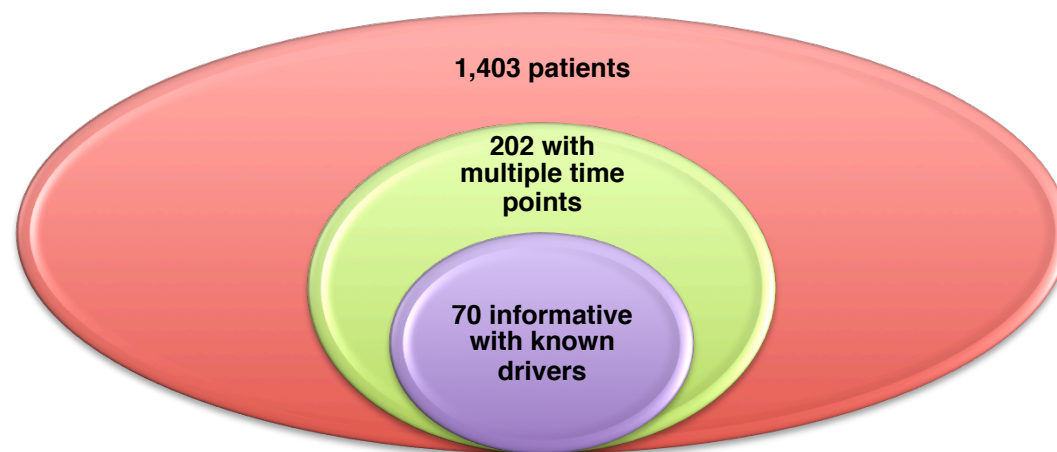

B

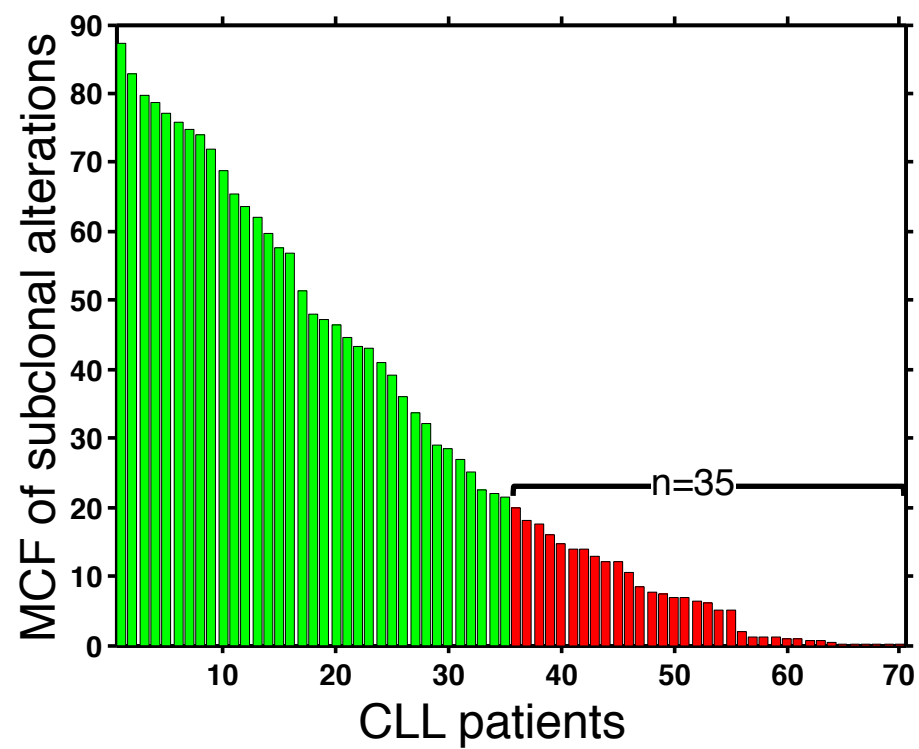

Supplement: supp [file elife-02869-supp-v1.zip]

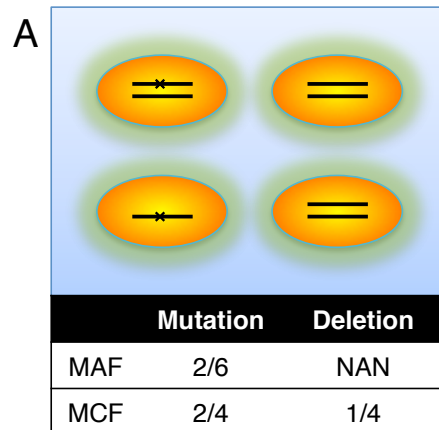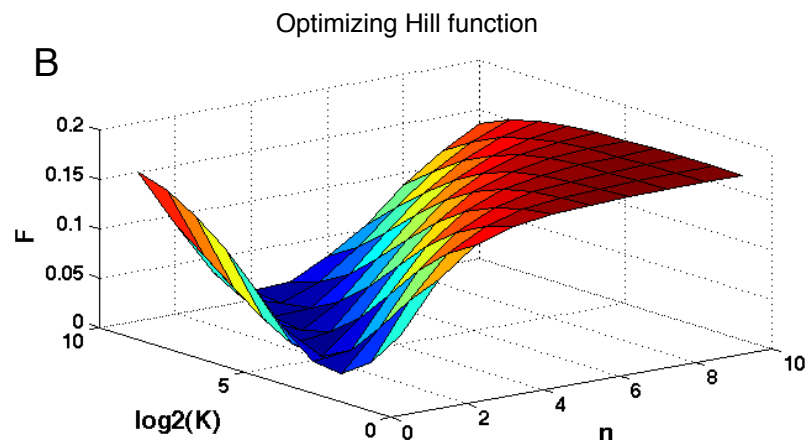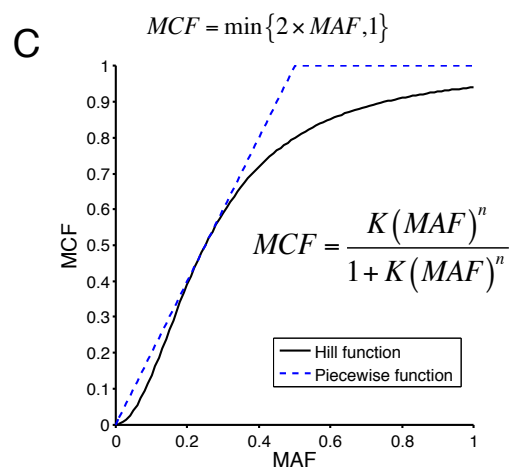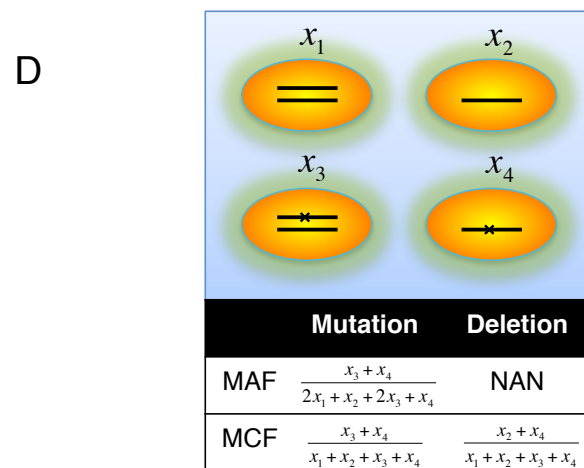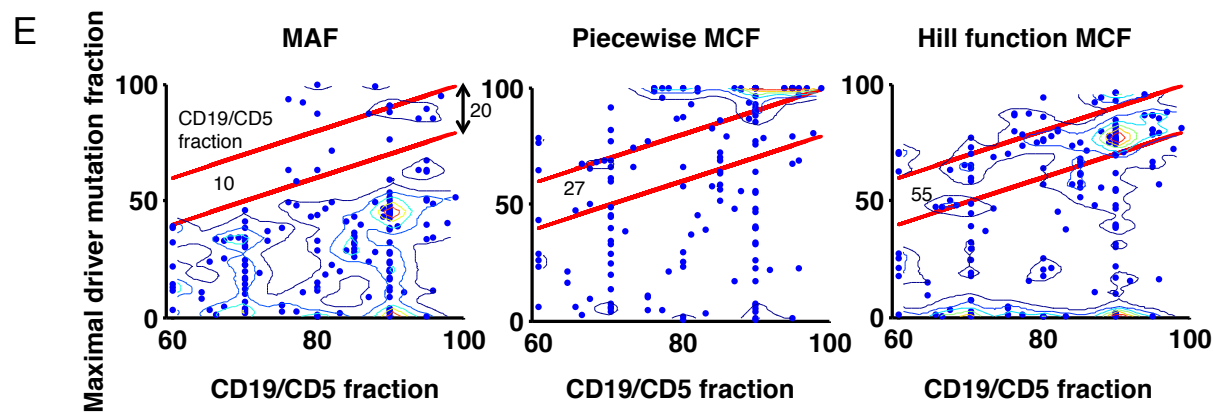

Supplement: supp [file elife-02869-supp-v1.zip]

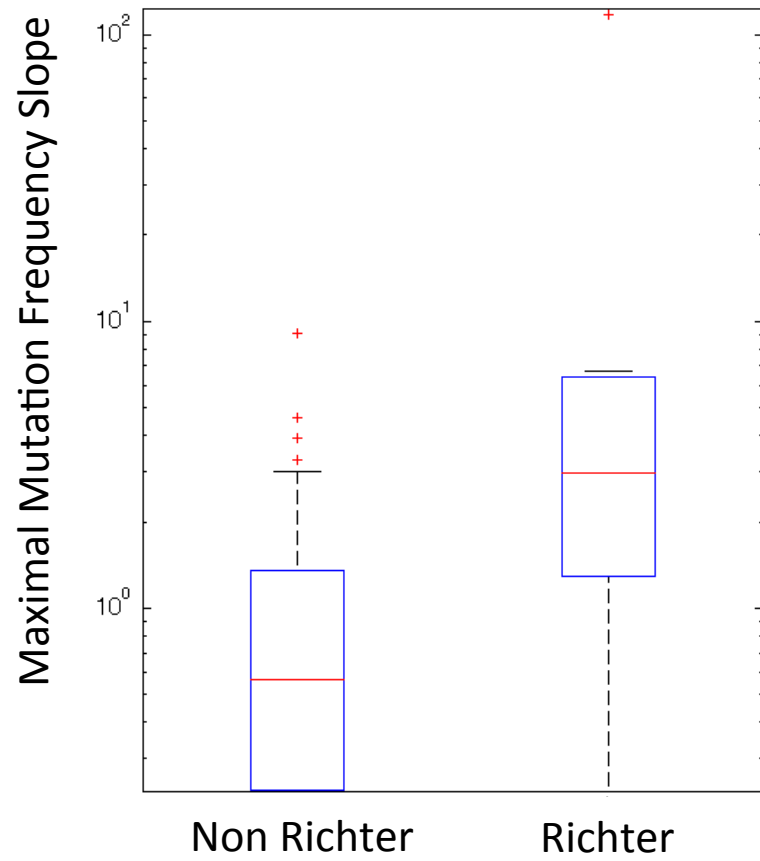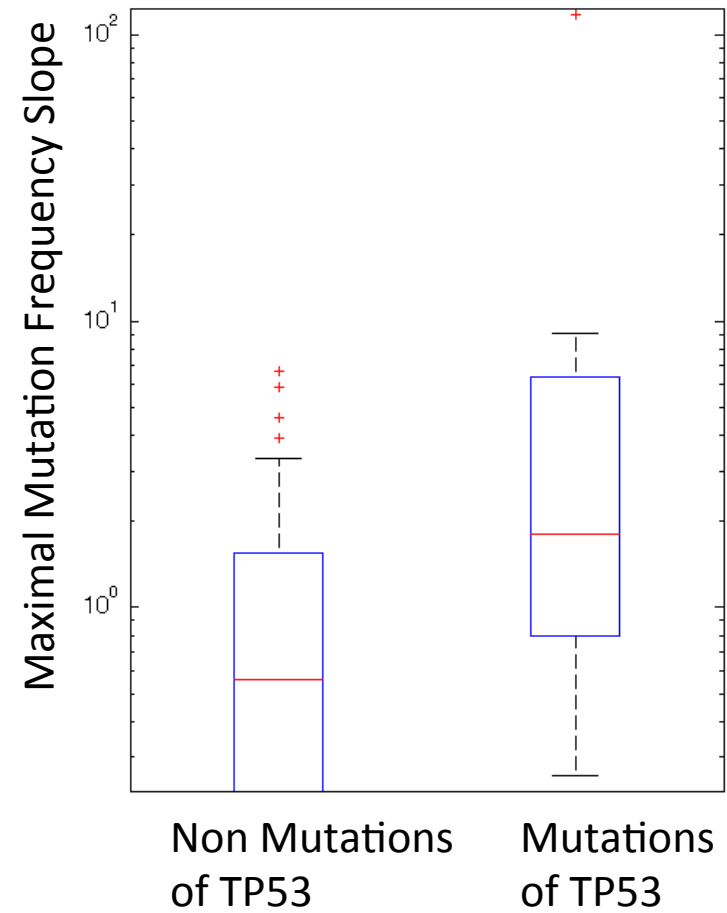

Supplement: supp [file elife-02869-supp-v1.zip]

A

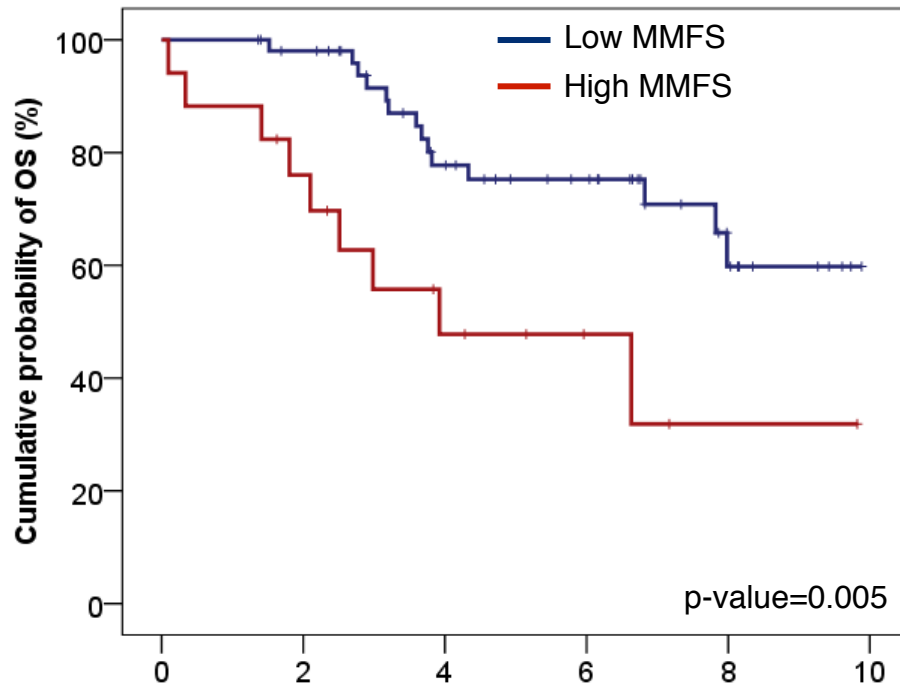

At risk

|    |    |    |    |    |   |
|----|----|----|----|----|---|
| 53 | 49 | 33 | 25 | 10 | 0 |
| 17 | 12 | 6  | 3  | 1  | 0 |

|           | N  | Events | 5-year OS | 95% CI    |
|-----------|----|--------|-----------|-----------|
| Low MMFS  | 53 | 14     | 75.3%     | 62.6-88.0 |
| High MMFS | 17 | 9      | 47.8%     | 22.2-73.4 |

B

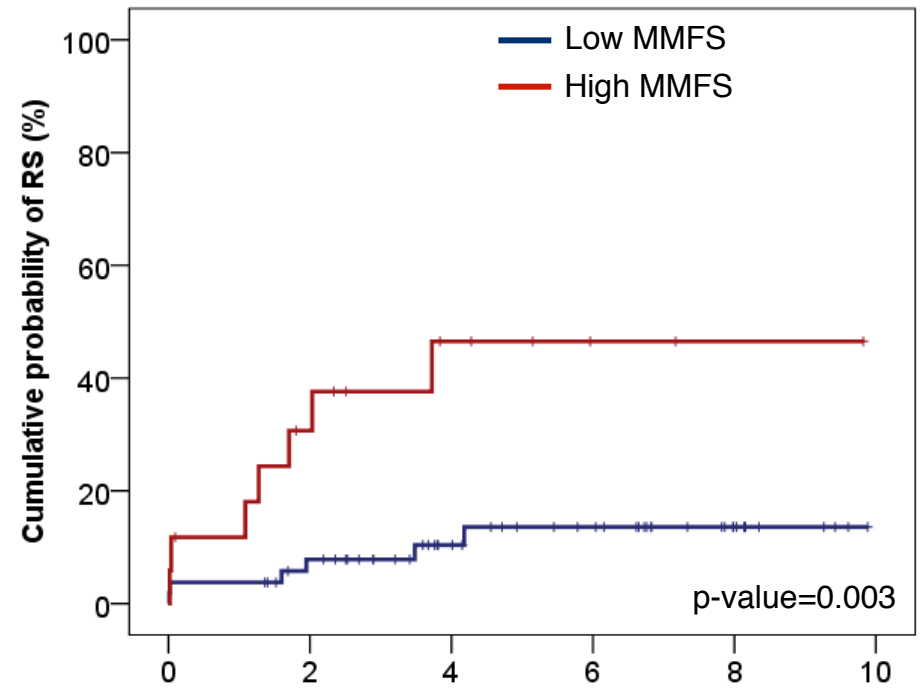

At risk

|    |    |    |    |   |   |
|----|----|----|----|---|---|
| 53 | 45 | 30 | 22 | 9 | 0 |
| 17 | 10 | 5  | 2  | 1 | 0 |

|           | N  | Events | 5-year RS | 95% CI    |
|-----------|----|--------|-----------|-----------|
| Low MMFS  | 53 | 6      | 13.6%     | 3.3-23.9  |
| High MMFS | 17 | 7      | 46.5%     | 20.5-72.5 |

Supplement: supp [file elife-02869-supp-v1.zip]

Wait and Watch

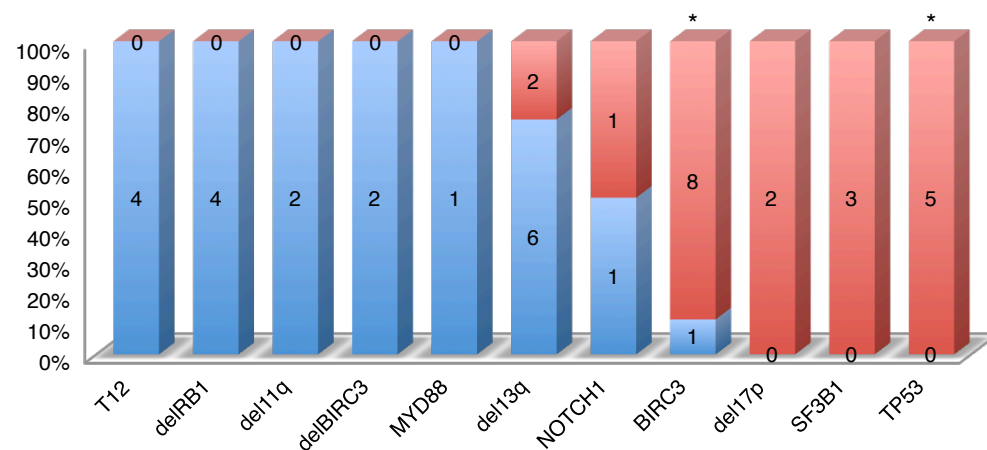

Chemotherapy

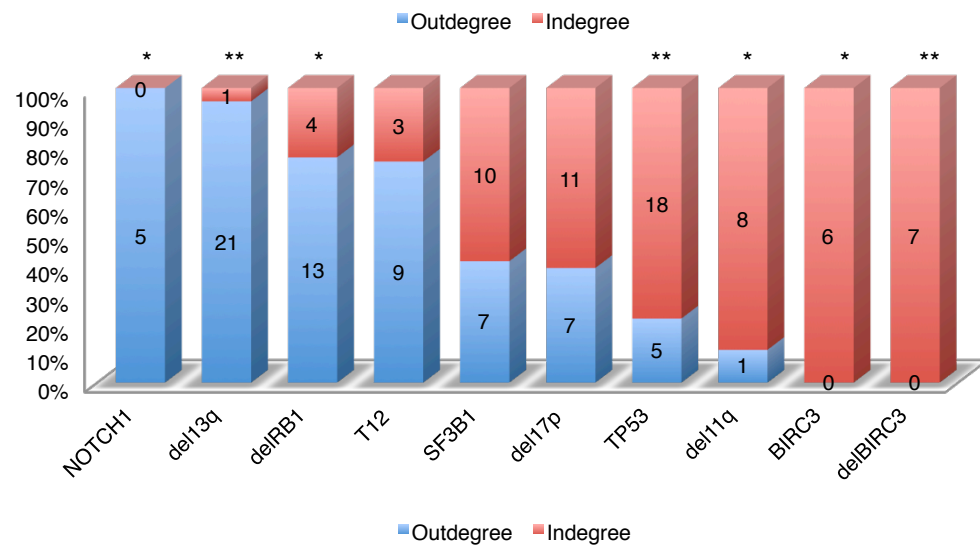

Supplement: supp [file elife-02869-supp-v1.zip]
